# Supplementary material
Source: publisher figshare collection journal article supplement (https://tandf.figshare.com/articles/dataset/_/24540951)
Supplement: Supplementary file 1 [file 1]

## **S1. Specimens Examined from Colombia**

*Pristimantis alius*.—COLOMBIA: VALLE DEL CAUCA: Municipio El Cairo,  
Reserva Natural Comunitaria Cerro El Inglés (CPZ-UV 6123-30).

*Pristimantis brevifrons*.—COLOMBIA: VALLE DEL CAUCA: Municipio El Cairo,  
Reserva Natural Comunitaria Cerro El Inglés (CPZ-UV 6851).

*Pristimantis buckleyi*.—COLOMBIA: VALLE DEL CAUCA: Municipio Pradera,  
Páramo de Las Tinajas (CPZ-UV 5731, 5811); Municipio Sevilla, Páramo de El  
Tibí (CPZ-UV 4344, 4356); ECUADOR: CARCHI: Ciudad El Ángel 9.9 km E  
(KU 217867).

*Pristimantis myersi*.—COLOMBIA: CAUCA: Municipio de Inzá, vereda Las  
Margaritas, finca Brisas del CAMPO (CPZ-UV 6519-20).

*Pristimantis xeniolum*.—COLOMBIA: VALLE DEL CAUCA: Municipio de Rio Frío,  
Parque Natural Regional Páramo del Duende (ICN 43877).

*Dendropsophus columbianus*.—COLOMBIA: CAUCA: Municipio Caloto, vereda  
Morales, Finca los Henao (CPZ-UV 3808, 3809).

*Centrolene buckleyi*.—COLOMBIA: VALLE DEL CAUCA: Municipio El Cairo,  
Reserva Natural Comunitaria Cerro El Inglés (CPZ-UV 3133); Municipio Cali,  
corregimiento Villa Carmelo, Parque Nacional Natural Farallones de Cali,  
Estación Corea (CPZ-UV 4849).

*Hyloscirtus larinopygion*.—COLOMBIA: VALLE DEL CAUCA: Municipio Florida,  
Resguardo Naza Kwessx Kiwe (CPZ-UV 5785); Municipio Palmira, Parque  
Natural Regional Nima (CPZ-UV 5165-66).

*Pristimantis palmeri*.—COLOMBIA: CAUCA: Municipio Caloto, vereda Morales,  
Finca los Henao (CPZ-UV 1723-25).

*Pristimantis erythropleura*.—COLOMBIA: VALLE DEL CAUCA: Municipio La  
Cumbre, corregimiento Bitaco, vereda Chicoral (CPZ-UV 3615, 3631).
